# Supplementary material for: 3D printing of PLA:CaP:GO scaffolds for bone tissue applications
Source: Royal Society of Chemistry journal article supplement (doi:10.1039/d3ra00981e), 2023-01-01
Supplement: d3ra00981e1.pdf [file d3ra00981e1.pdf]

## SUPPLEMENTARY INFORMATION

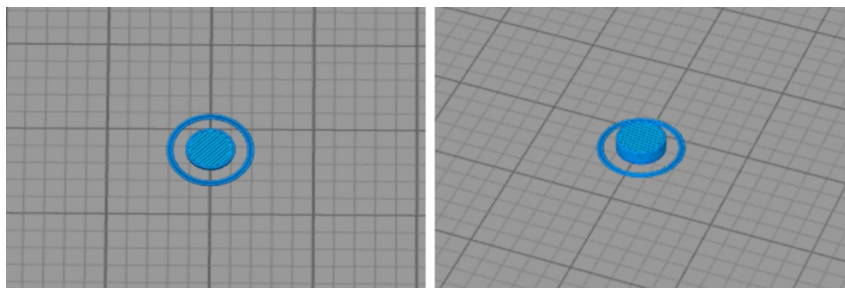

Figure S1. Simplify3D Professional software images of the printed PLA:CaP:GO scaffold model from different perspectives and at different times of the printing process.

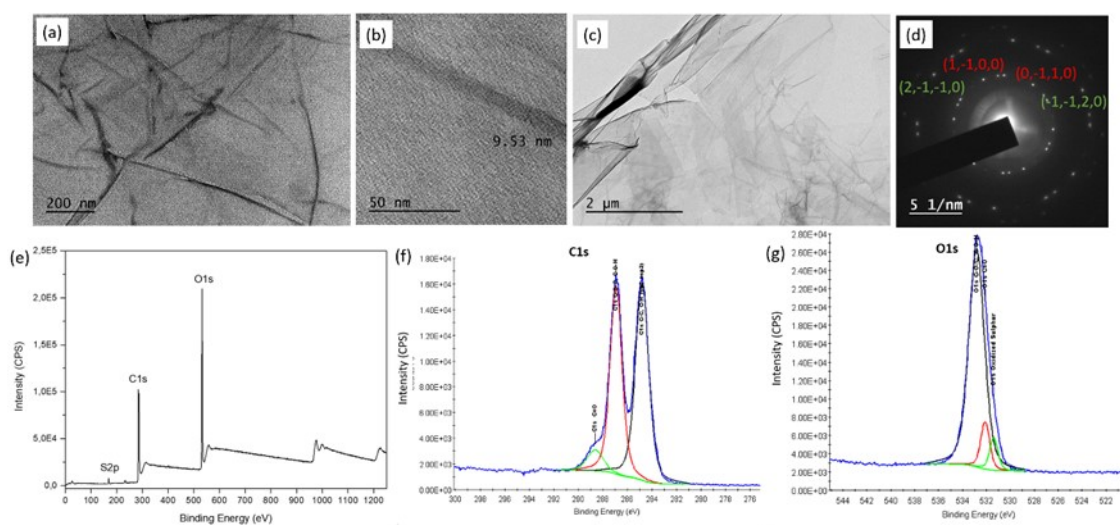

Figure S2. TEM micrographs of GO sheets (a-d) in general appearance (a), thickness measurement of the sheet folds  $\pm 0.01$  nm (b), extended sheet at 4000x (c) and inverted SAED pattern (d). XPS analysis (e-g) with general spectrum of GO sheets (e) and high-resolution spectra for the electronic transitions of C1s (f) and O1s (g).

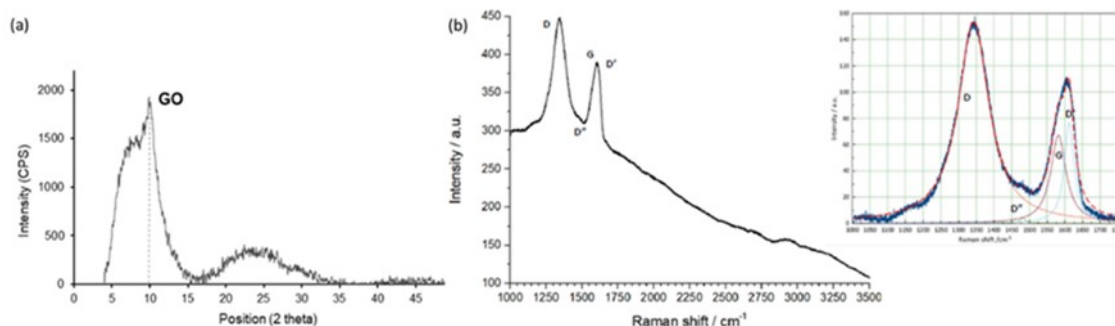

Figure S3. XRD diffraction pattern (a) and FT-Raman spectrum of GO sheets, with the corresponding deconvolution.
